# Supplementary material
Source: MDPI journal article supplement (https://www.mdpi.com/2073-4344/12/8/850)
Supplement: s1 [file s1 › catalysts-1840430-supplementary.pdf]

## Supplementary Materials

# High-Efficiency Oxygen Reduction to Hydrogen Peroxide Catalyzed by Oxidized Mo<sub>2</sub>TiC<sub>2</sub> MXene

Ge Li, Bin Zhou, Ping Wang, Miao He, Zhao Fang, Xilin Yuan, Weiwei Wang, Xiaohua Sun  
\* and Zhenxing Li \*

State Key Laboratory of Heavy Oil Processing, College of New Energy and Materials, China University of Petroleum (Beijing), Beijing 102249, China; superligelge@163.com (G.L.); wenwubin2@163.com (B.Z.); Wpingnib@163.com (P.W.); hemiao9603@163.com (M.H.); fangzhaost@163.com (Z.F.); 13156296206@163.com (X.Y.); weiweiwang\_work@163.com (W.W.)  
\* Correspondence: hua82@126.com (X.S.); lizx@cup.edu.cn (Z.L.)

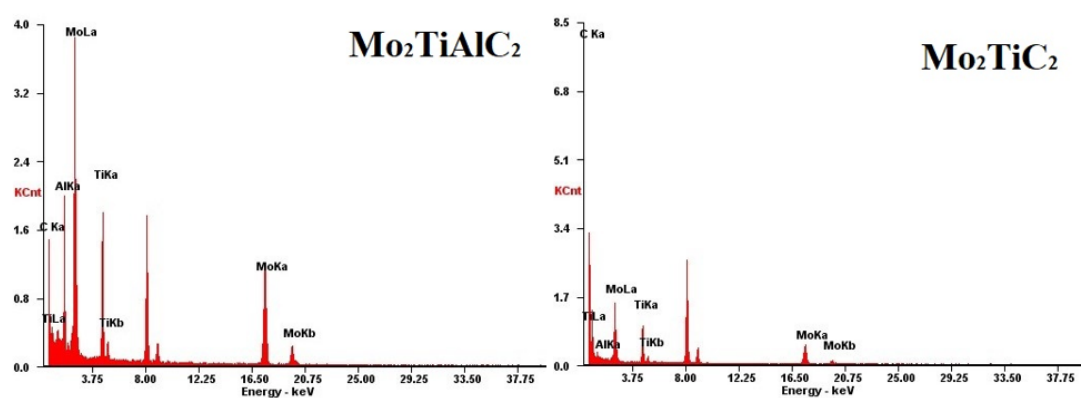

Figure S1. TEM-EDAX patterns of  $\text{Mo}_2\text{TiC}_2$  MXene and  $\text{O-Mo}_2\text{TiAlC}_2$ .

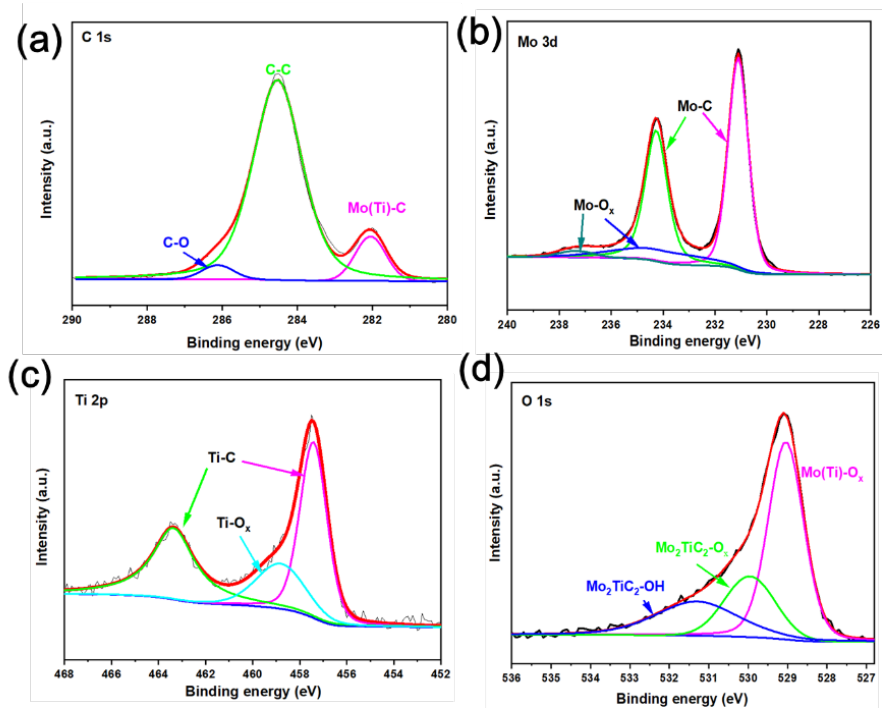

**Figure S2.** High-resolution XPS spectra of  $\text{Mo}_2\text{TiC}_2$  MXene (a) C 1s, (b) Mo 3d, (c) Ti 2p and (d) O 1s.

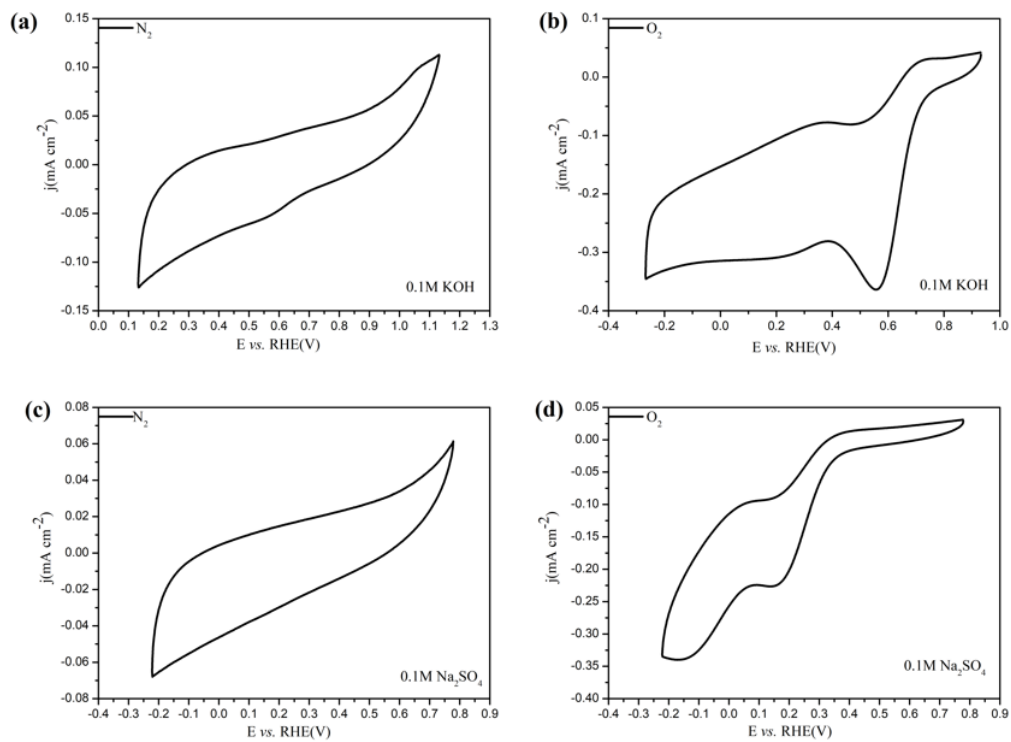

**Figure S3. CV curves of O-Mo<sub>2</sub>TiC<sub>2</sub> in two different electrolytes, with a scan rate of 50 mV s<sup>-1</sup>. 0.1 M KOH solution: (a) saturated with N<sub>2</sub>, (b) saturated with O<sub>2</sub>; 0.1 M Na<sub>2</sub>SO<sub>4</sub> solution: (c) N<sub>2</sub> saturated, (d) O<sub>2</sub> saturated.**

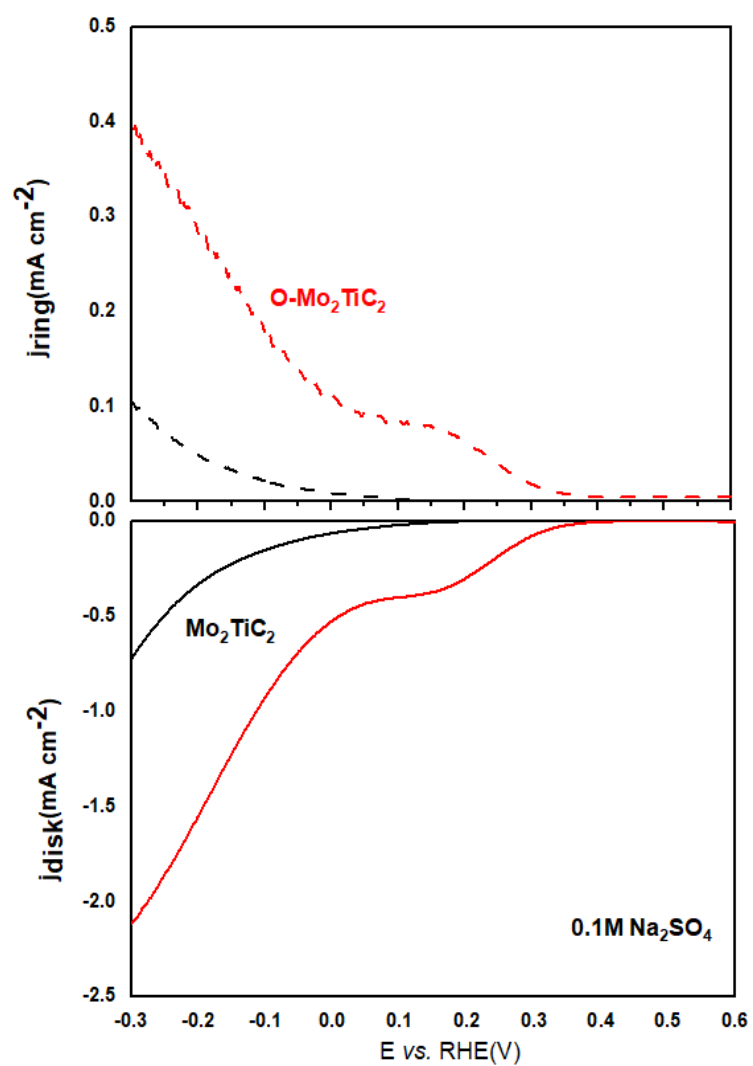

**Figure S4.** Polarization curves (solid line) and H<sub>2</sub>O<sub>2</sub> detection current densities (dashed lines) at the ring electrode for Mo<sub>2</sub>TiC<sub>2</sub> MXene and O-Mo<sub>2</sub>TiC<sub>2</sub>t at 1600 rpm in 0.1 M Na<sub>2</sub>SO<sub>4</sub> solution.

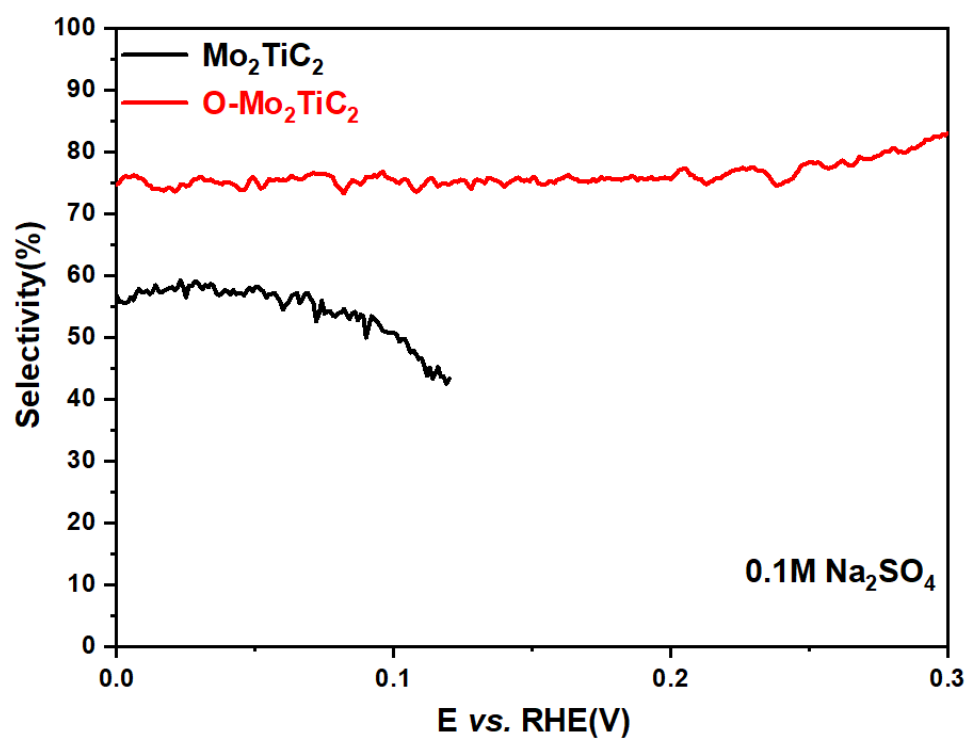

Figure S5.  $\text{H}_2\text{O}_2$  selectivity of  $\text{Mo}_2\text{TiC}_2$  MXene and  $\text{O-Mo}_2\text{TiC}_2$  in 0.1 M  $\text{Na}_2\text{SO}_4$  solution.

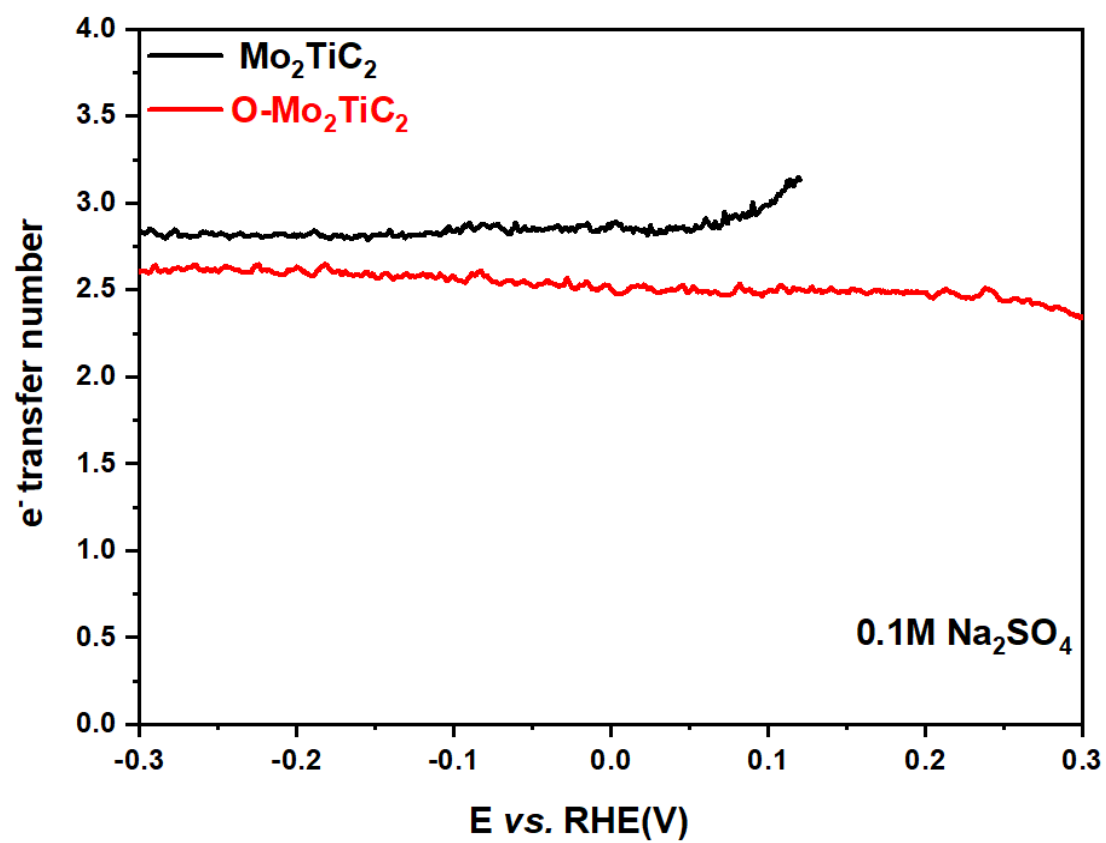

Figure S6. Transfer electron number of  $\text{Mo}_2\text{TiC}_2$  MXene and  $\text{O-Mo}_2\text{TiC}_2$  in 0.1 M  $\text{Na}_2\text{SO}_4$  solution.

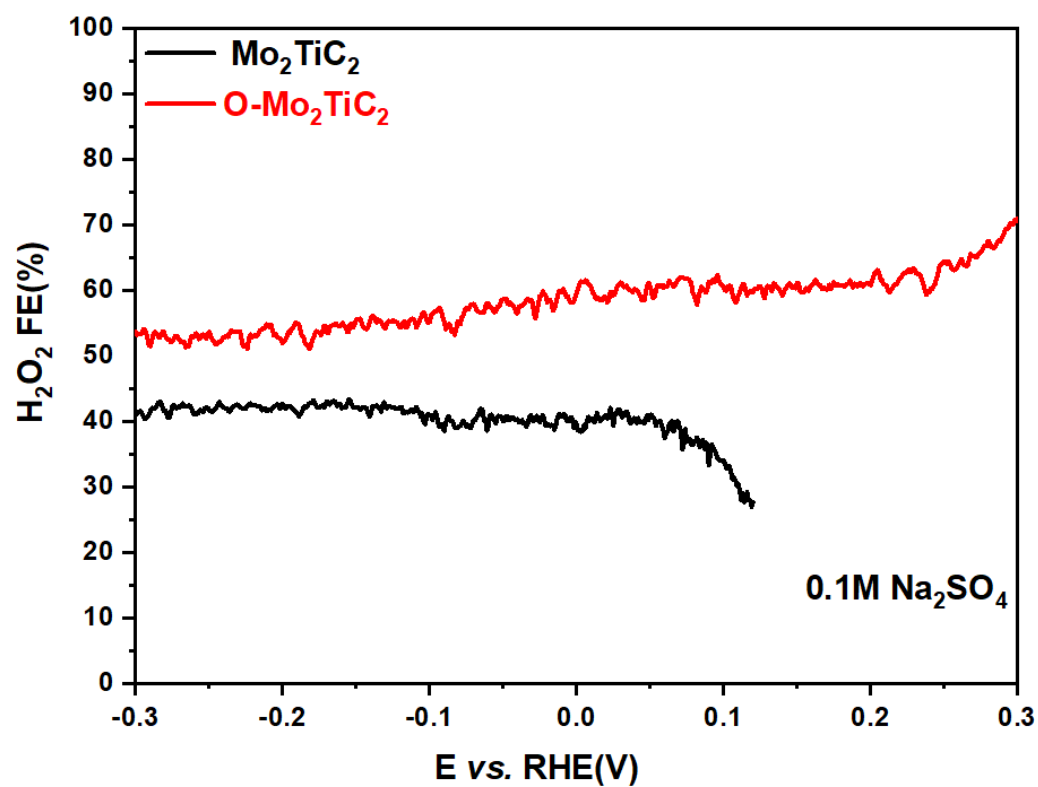

Figure S7. Faradaic efficiency of  $\text{Mo}_2\text{TiC}_2$  MXene and  $\text{O-Mo}_2\text{TiC}_2$  in 0.1 M  $\text{Na}_2\text{SO}_4$  solution.

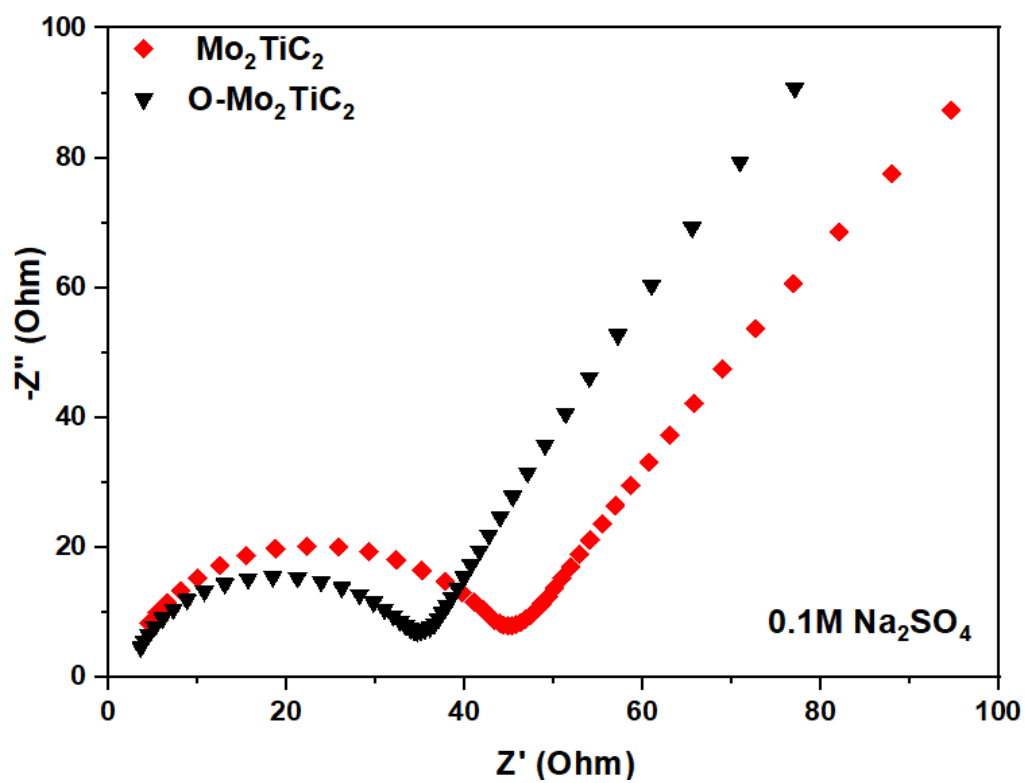

Figure S8. Nyquist plots of catalysts  $\text{Mo}_2\text{TiC}_2$  MXene and  $\text{O-Mo}_2\text{TiC}_2$  in 0.1 M  $\text{Na}_2\text{SO}_4$  solution.

**Table S1 EIS data obtained by fitting the experimental data,  $R_1$  is the simulated internal resistance,  $R_2$  is the charge transfer resistance**

| Electrocatalysts                                                                | $R_1$ ( $\Omega$ ) | $R_2$ ( $\Omega$ ) |
|---------------------------------------------------------------------------------|--------------------|--------------------|
| Mo <sub>2</sub> TiC <sub>2</sub> MXene (0.1 M KOH)                              | 2.59               | 50.05              |
| O-Mo <sub>2</sub> TiC <sub>2</sub> (0.1 M KOH)                                  | 2.137              | 33.5               |
| Mo <sub>2</sub> TiC <sub>2</sub> MXene (0.1 M Na <sub>2</sub> SO <sub>4</sub> ) | 2.19               | 38.79              |
| O-Mo <sub>2</sub> TiC <sub>2</sub> (0.1 M Na <sub>2</sub> SO <sub>4</sub> )     | 1.845              | 32.03              |

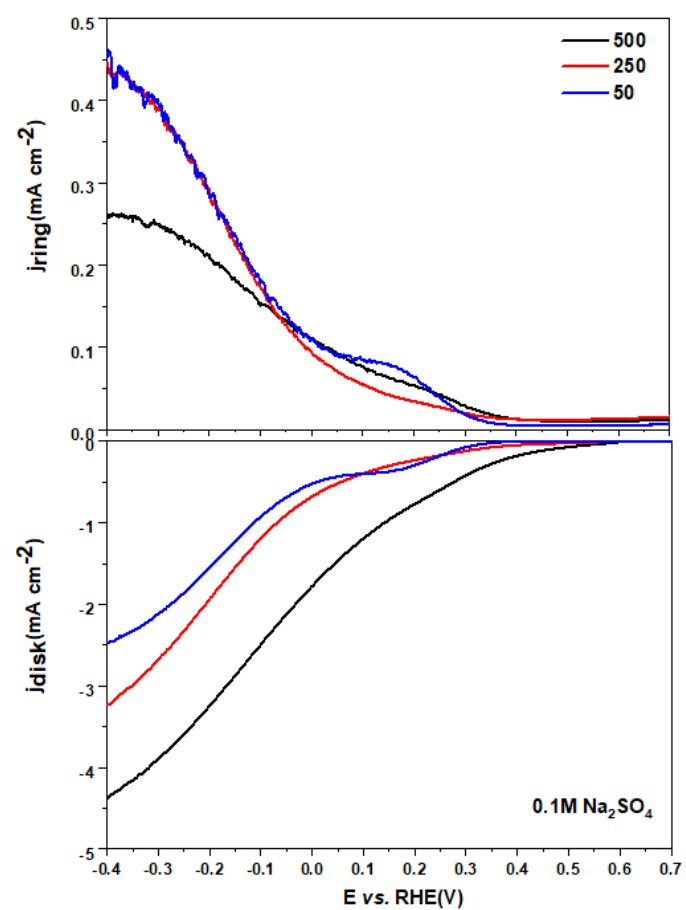

Figure S9. Different loadings of O-Mo<sub>2</sub>TiC<sub>2</sub> LSV curves in 0.1 M Na<sub>2</sub>SO<sub>4</sub> solution at 1600 rpm.

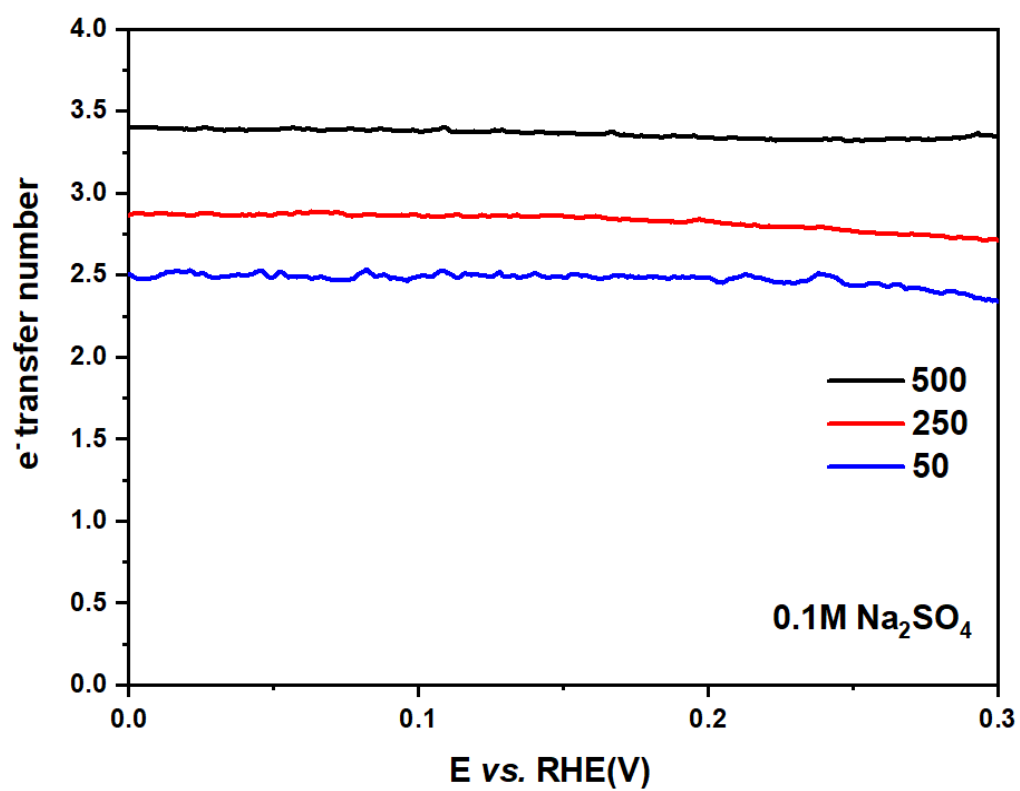

Figure S10. Number of transferred electrons of O-Mo<sub>2</sub>TiC<sub>2</sub> with different loadings in 0.1 M Na<sub>2</sub>SO<sub>4</sub> solution.

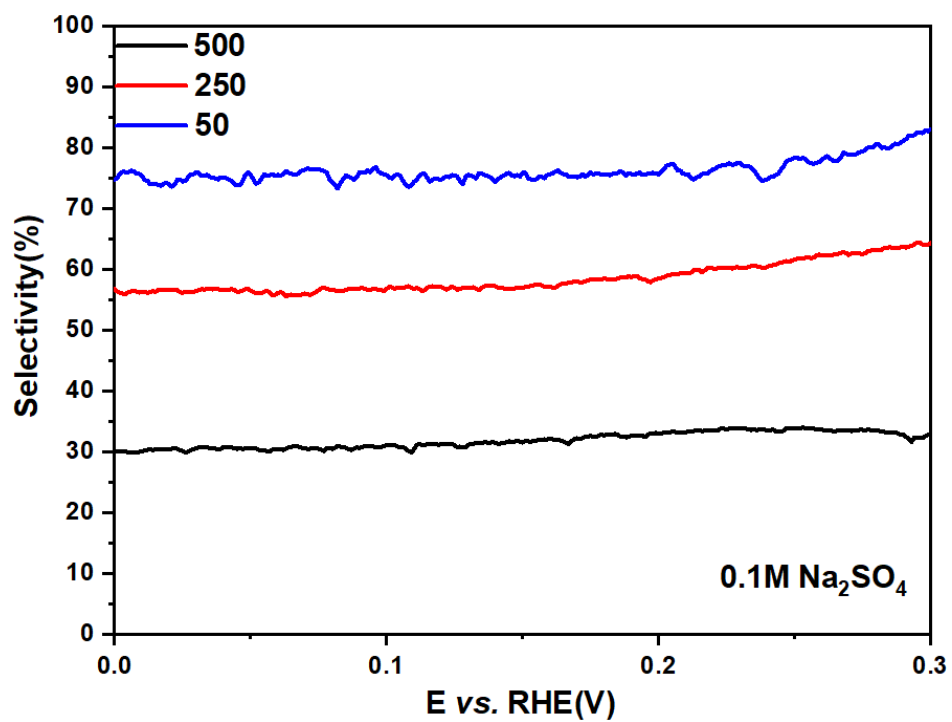

Figure S11. H<sub>2</sub>O<sub>2</sub> selectivity of O-Mo<sub>2</sub>TiC<sub>2</sub> with different loadings in 0.1 M Na<sub>2</sub>SO<sub>4</sub> solution.

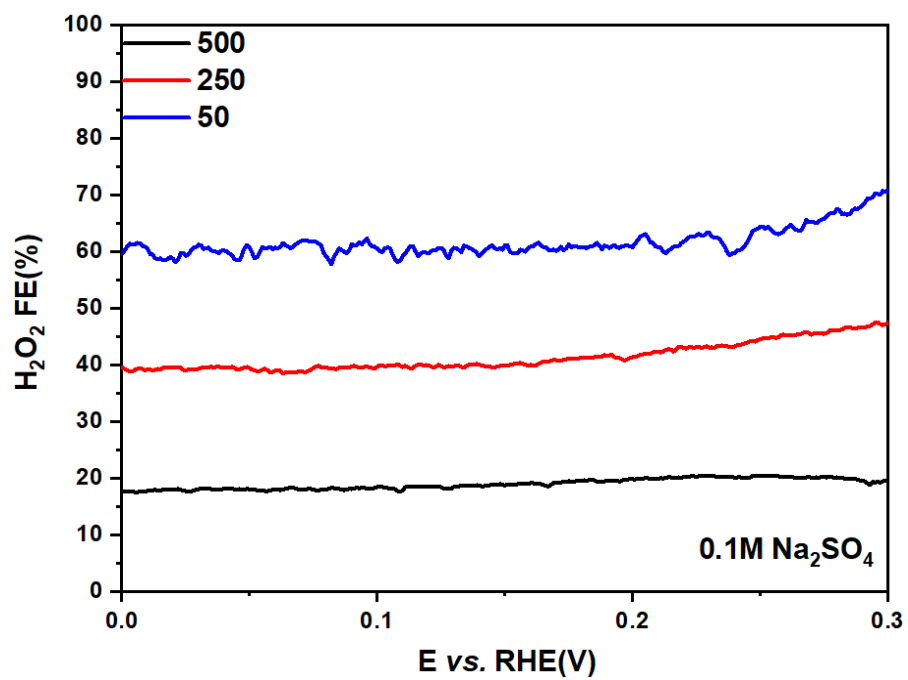

Figure S12. Faradaic efficiency of  $\text{O-Mo}_2\text{TiC}_2$  with different loadings in  $0.1\text{ M Na}_2\text{SO}_4$  solution.

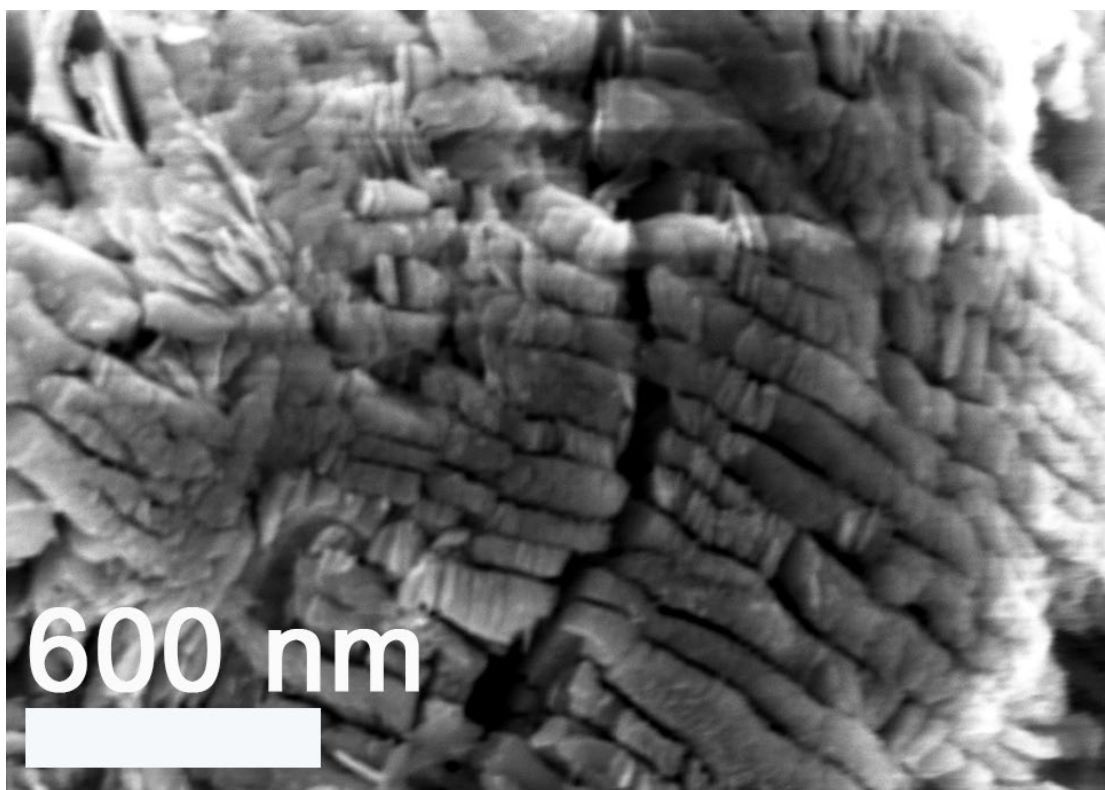

**Figure S13. SEM image of O-Mo<sub>2</sub>TiC<sub>2</sub> with thicker thickness.**

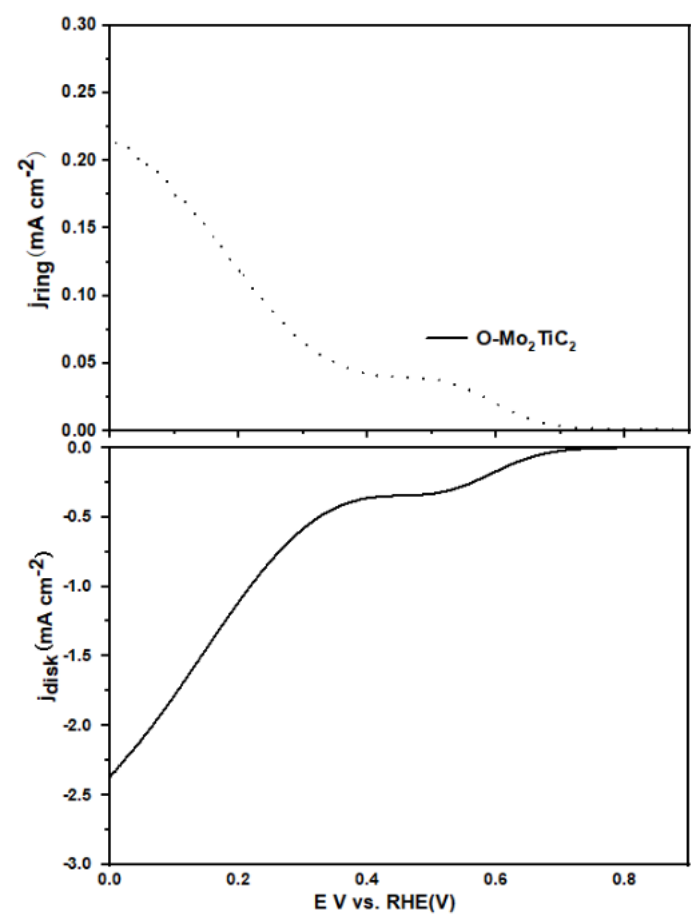

Figure S14. LSV curves of  $\text{O-Mo}_2\text{TiC}_2$  with thicker thickness in 0.1M KOH.

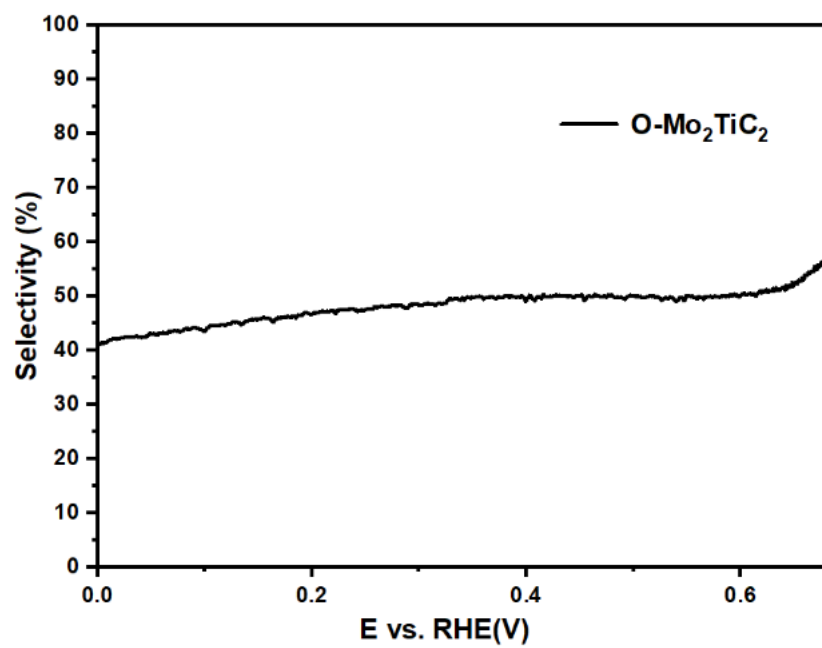

Figure S15. H<sub>2</sub>O<sub>2</sub> selectivity of O-Mo<sub>2</sub>TiC<sub>2</sub> with thicker thickness in 0.1M KOH.

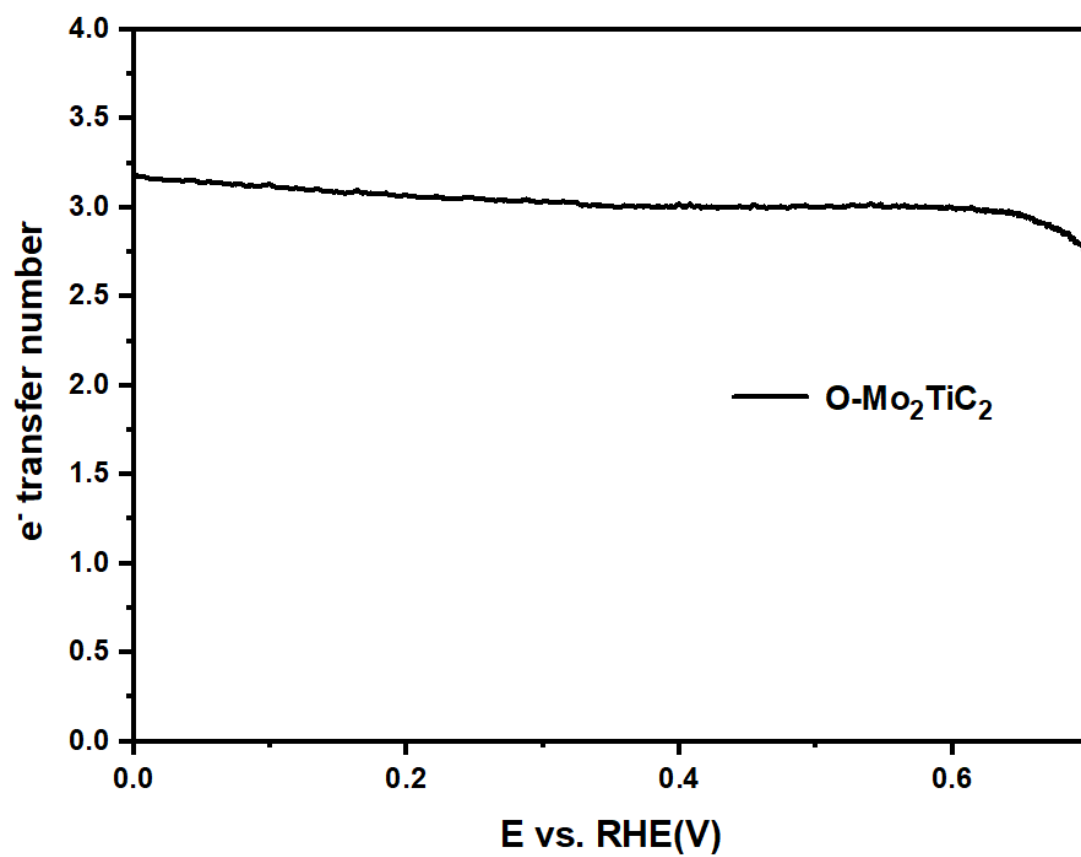

Figure S16. Number of transferred electrons of O-Mo<sub>2</sub>TiC<sub>2</sub> with thicker thickness in 0.1M KOH.

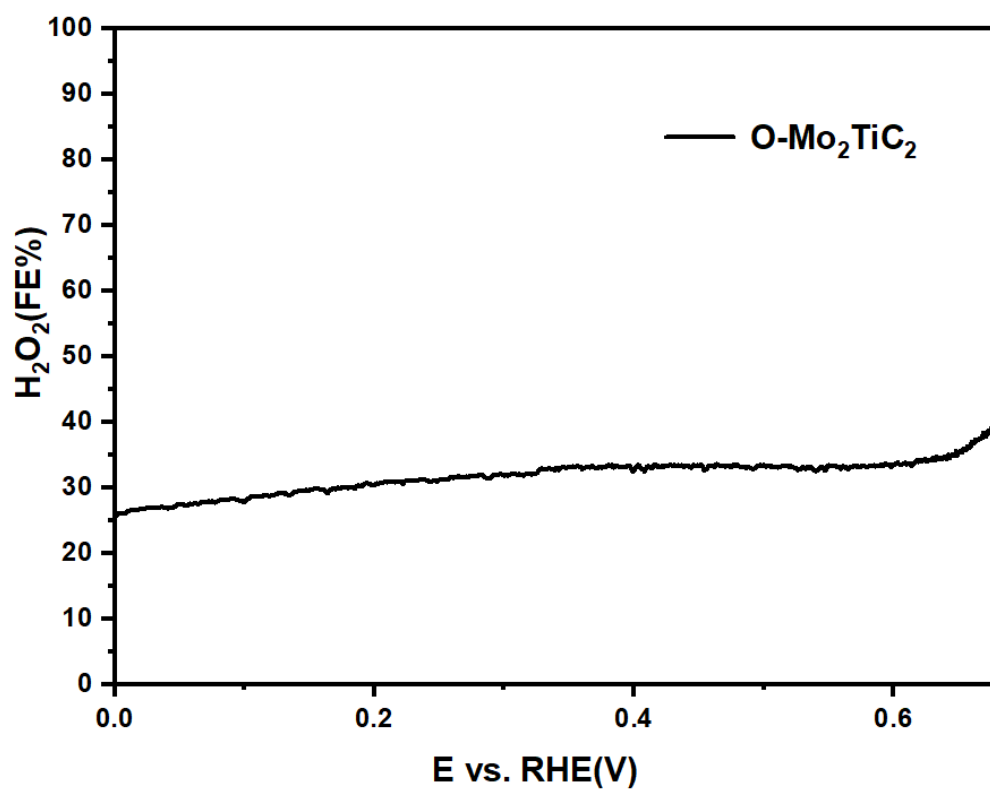

Figure S17. Faradaic efficiency of  $\text{O-Mo}_2\text{TiC}_2$  with thicker thickness in 0.1M KOH.

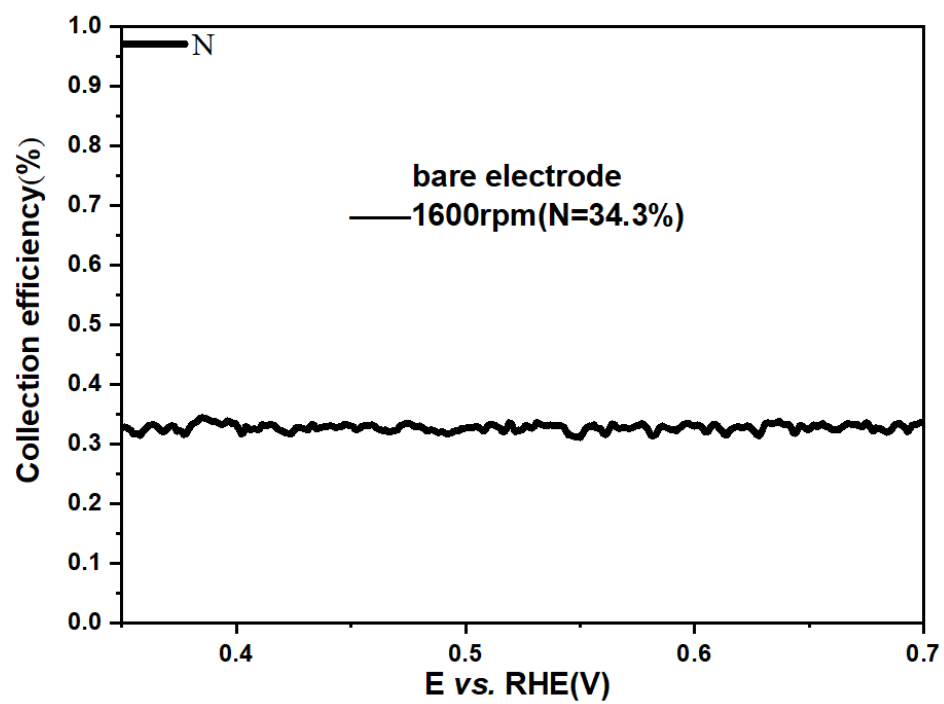

Figure S18. Collection efficiency of pure RRDE electrodes: N=34.3%.
